# Supplementary material for: Inhibition of the Growth of Breast Cancer-Associated Brain Tumors by the Osteocyte-Derived Conditioned Medium
Source: MDPI journal article supplement (doi:10.3390/cancers13051061), 2021-03-03

Uncropped gels

Figure 1

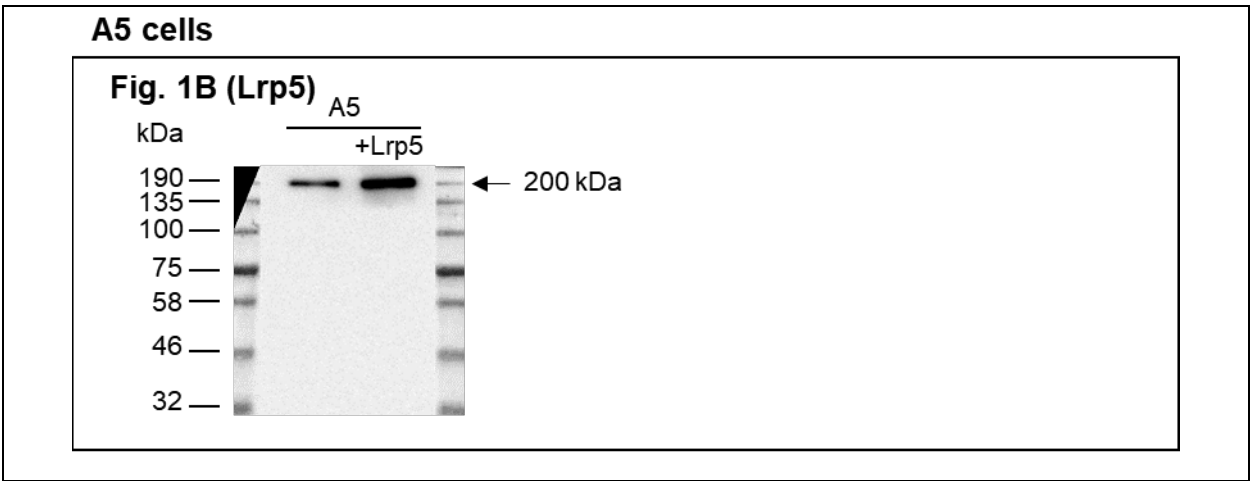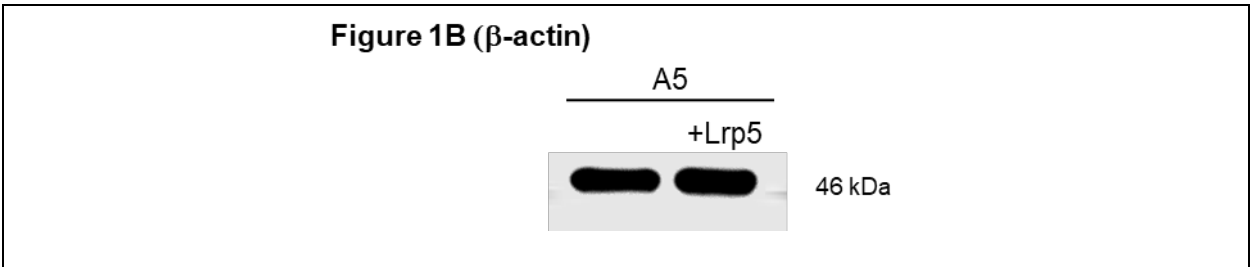

Figure 4

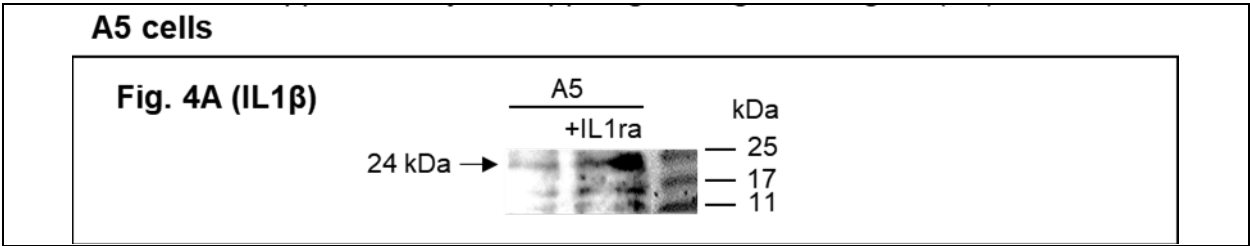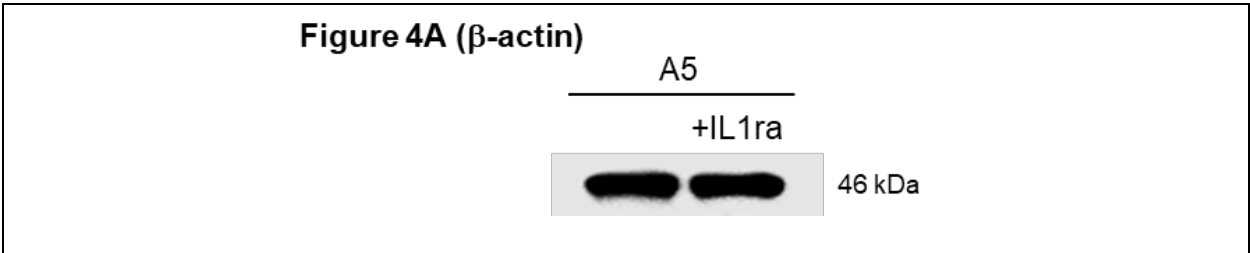

**Figure 6**

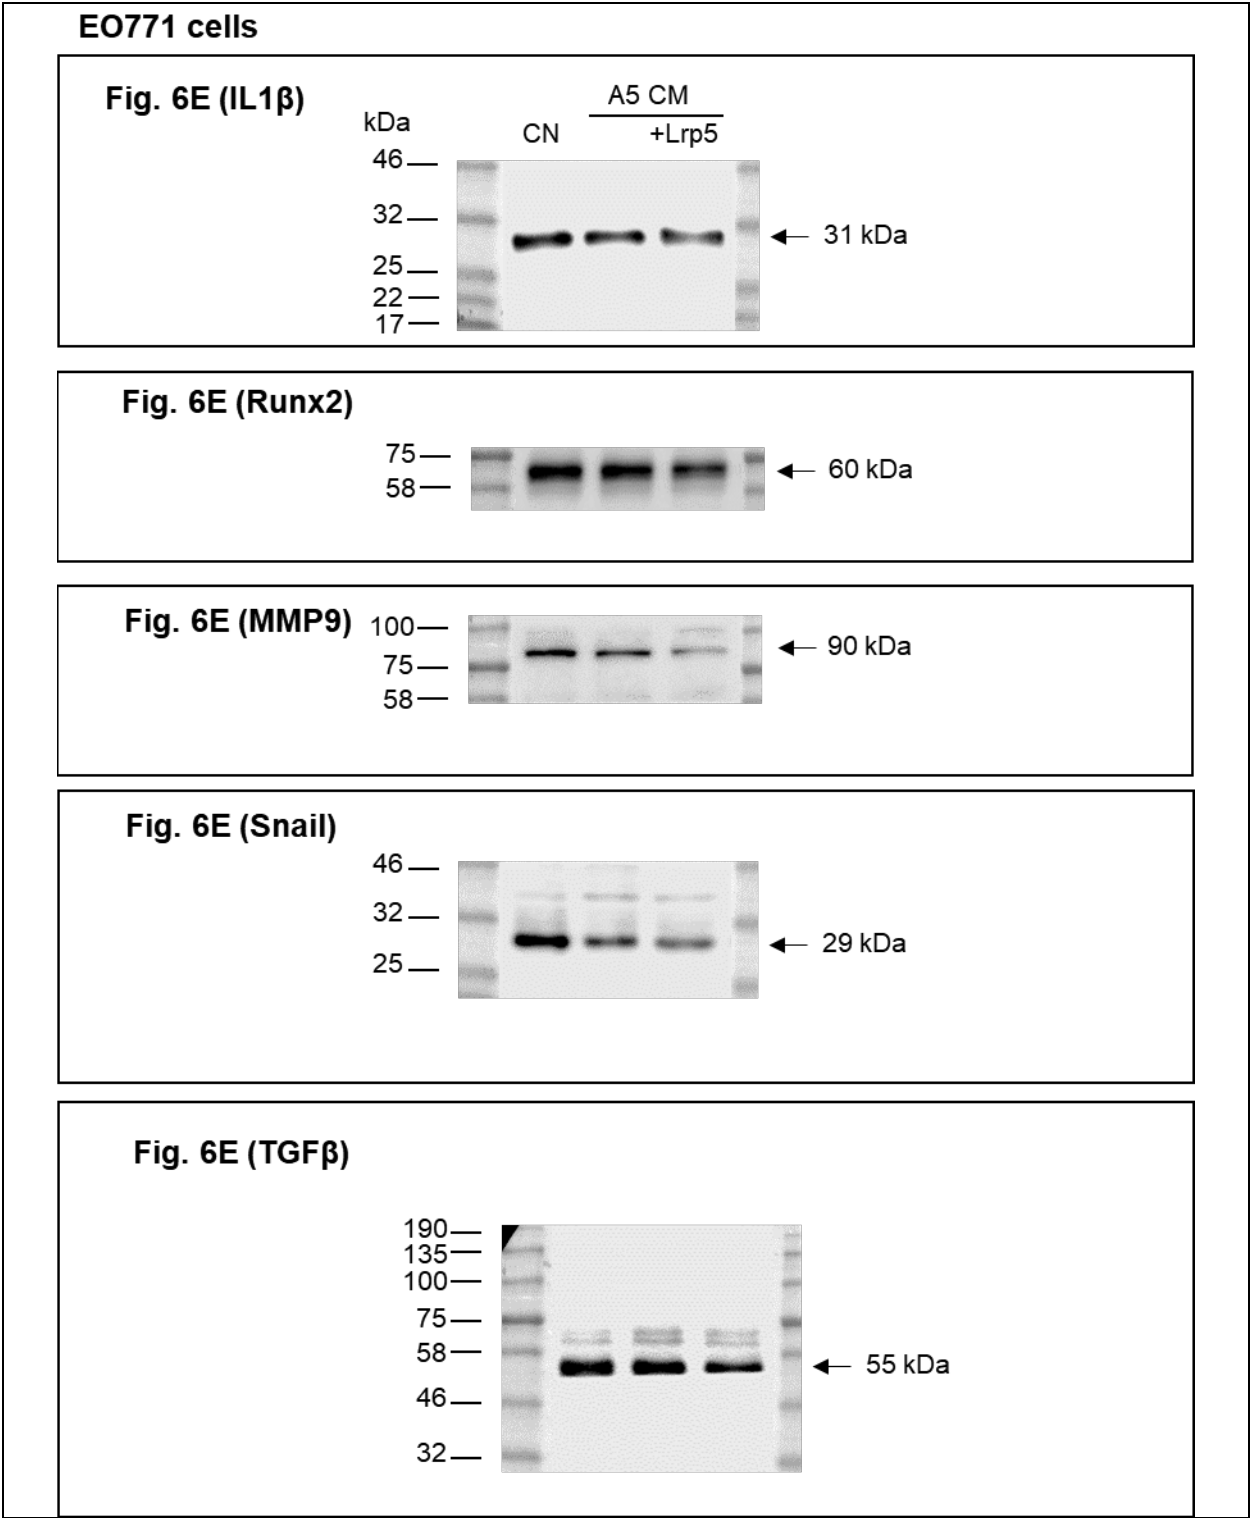

**Figure 6**

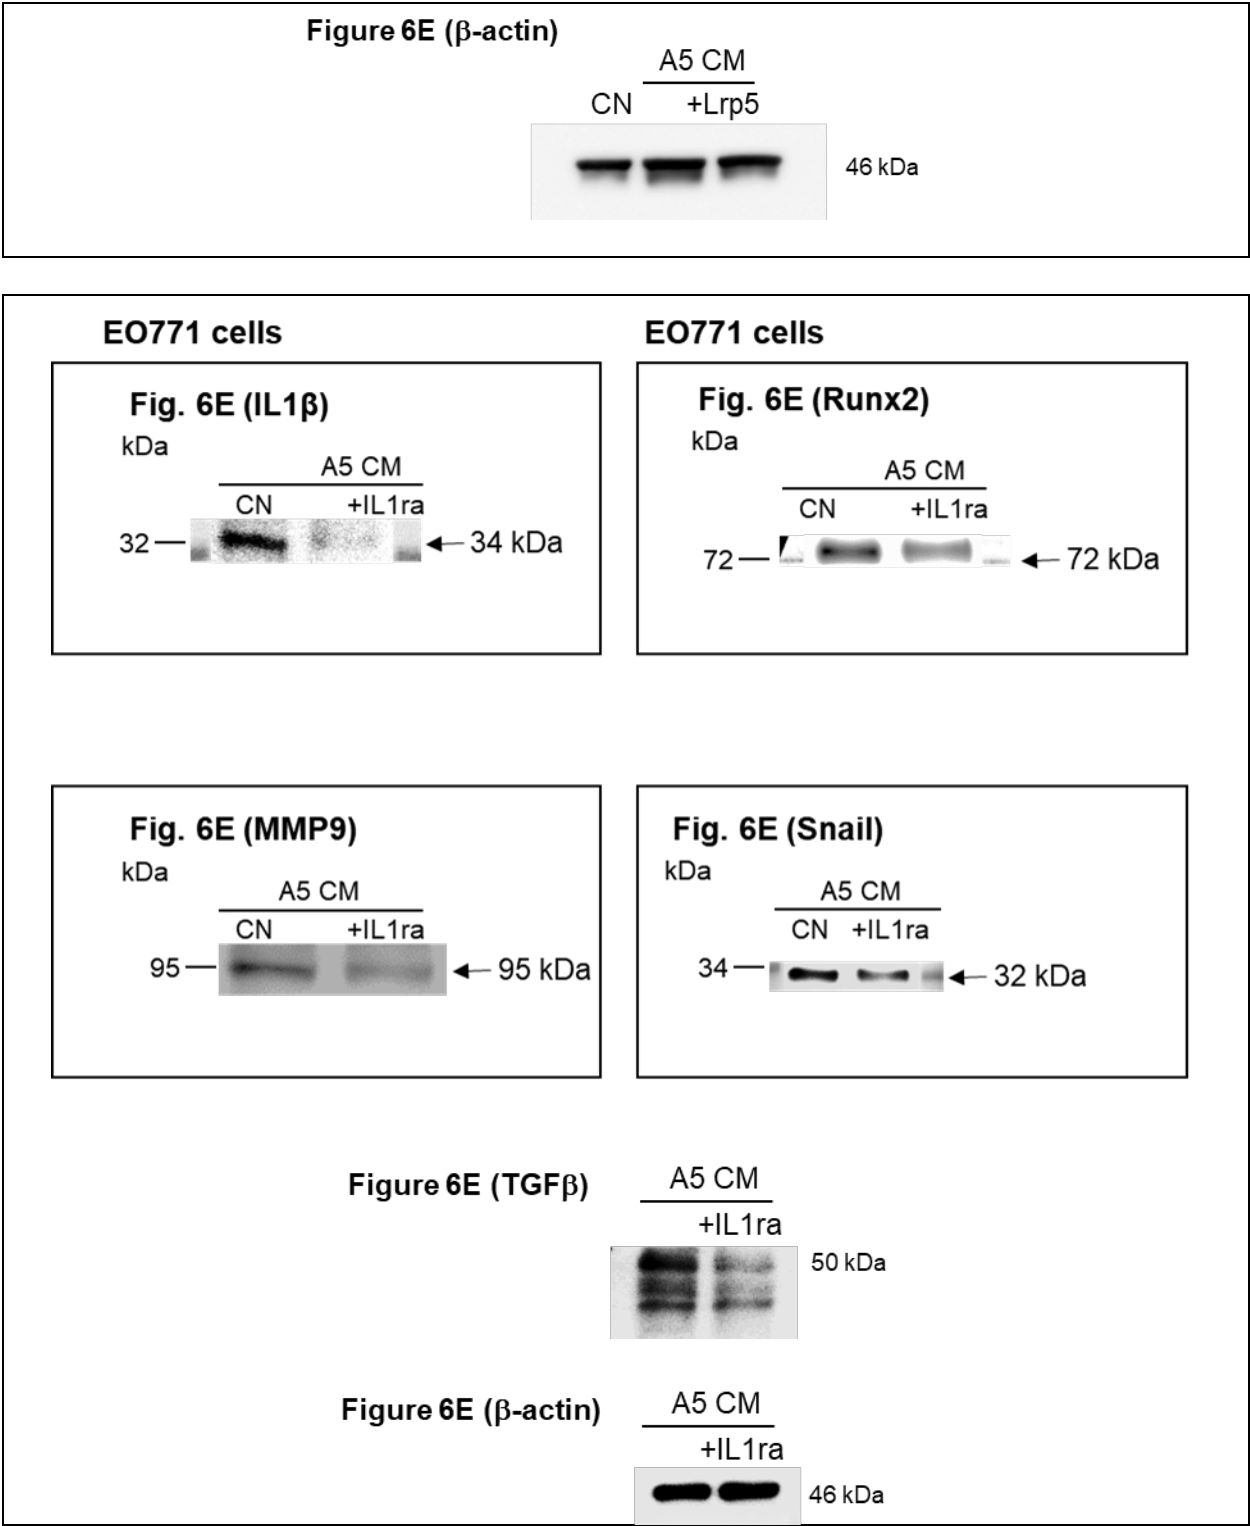

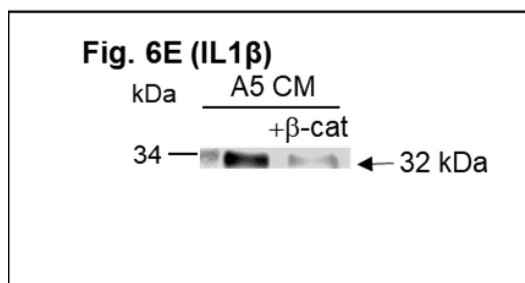

**E0771 cells**

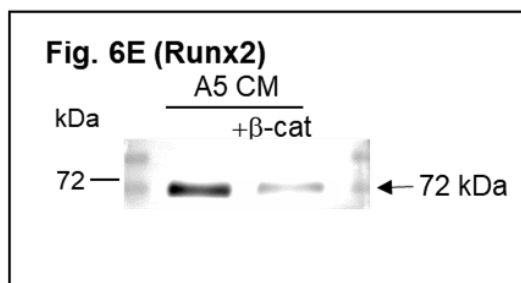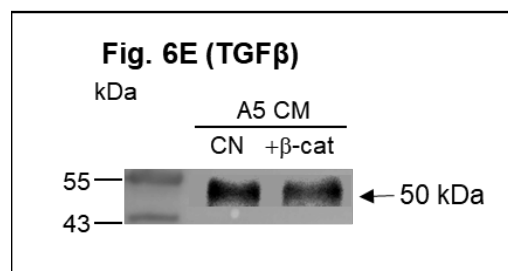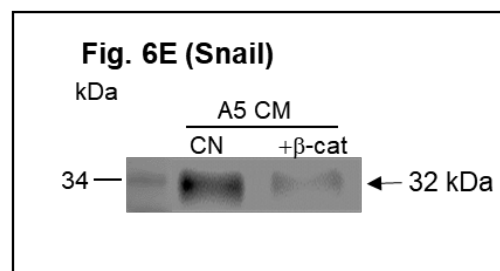

**Figure 6E (MMP9)**

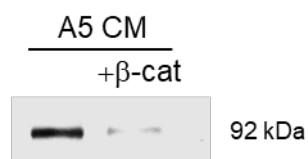

**Figure 6E (β-actin)**

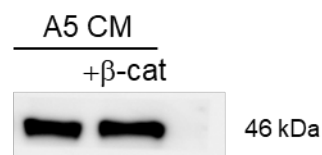

**E0771 cells**

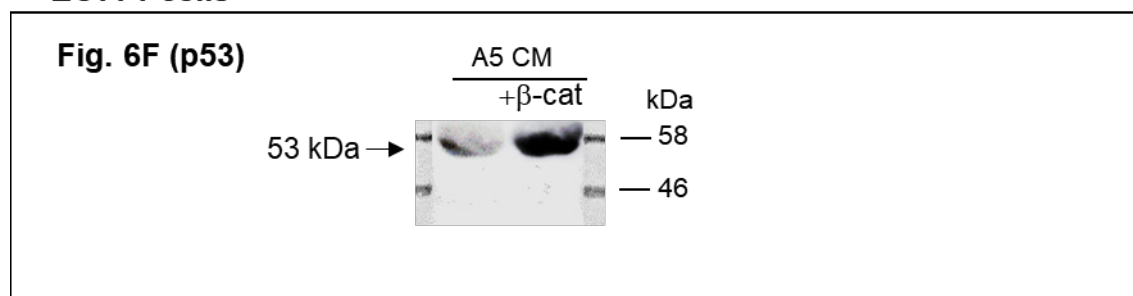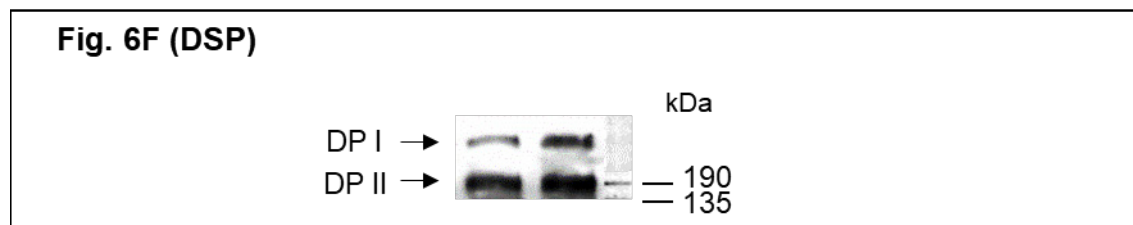

**Figure 6**

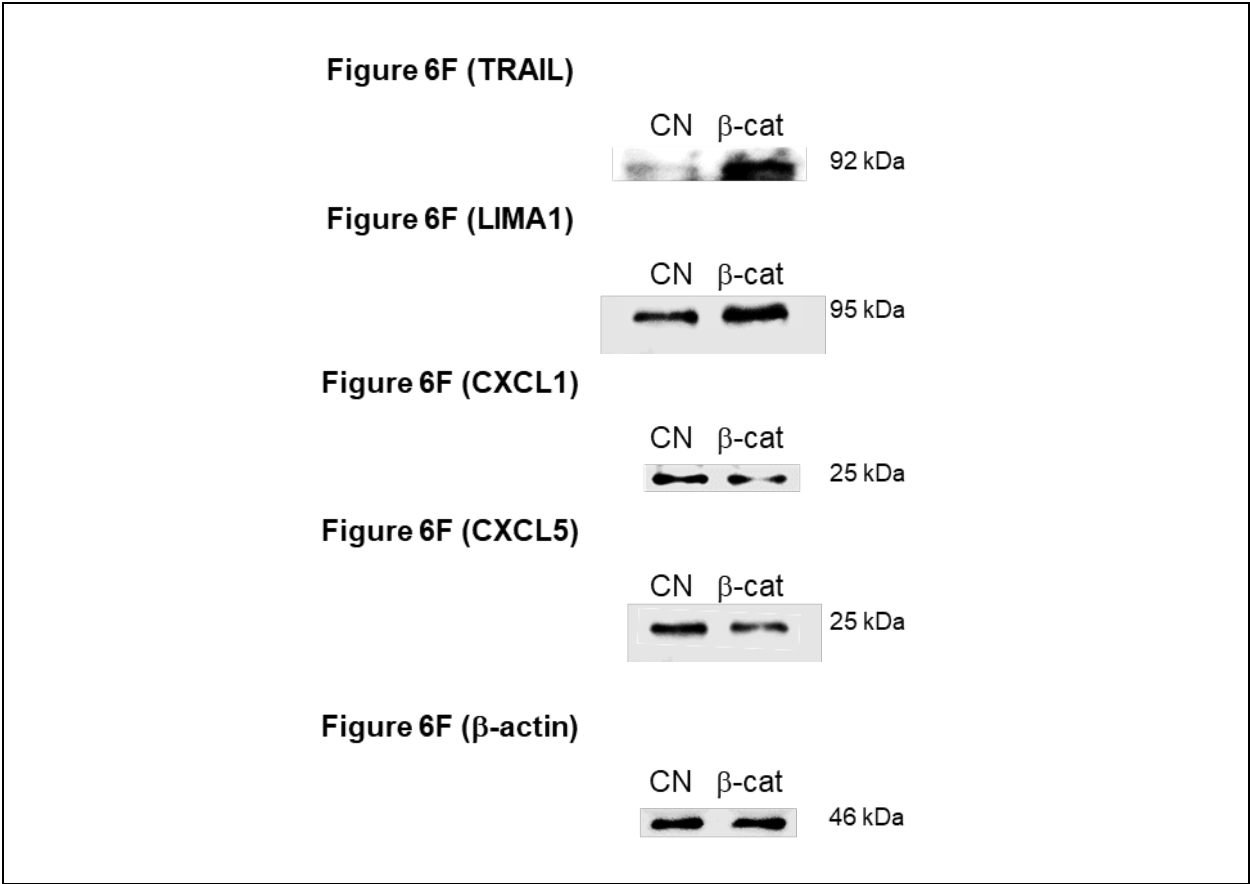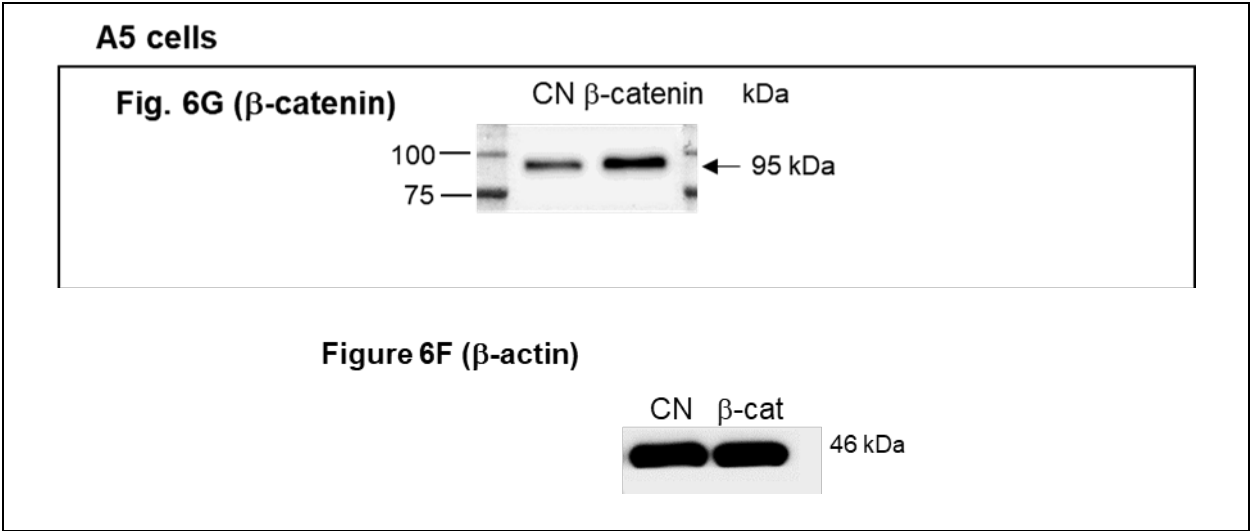

Figure 7

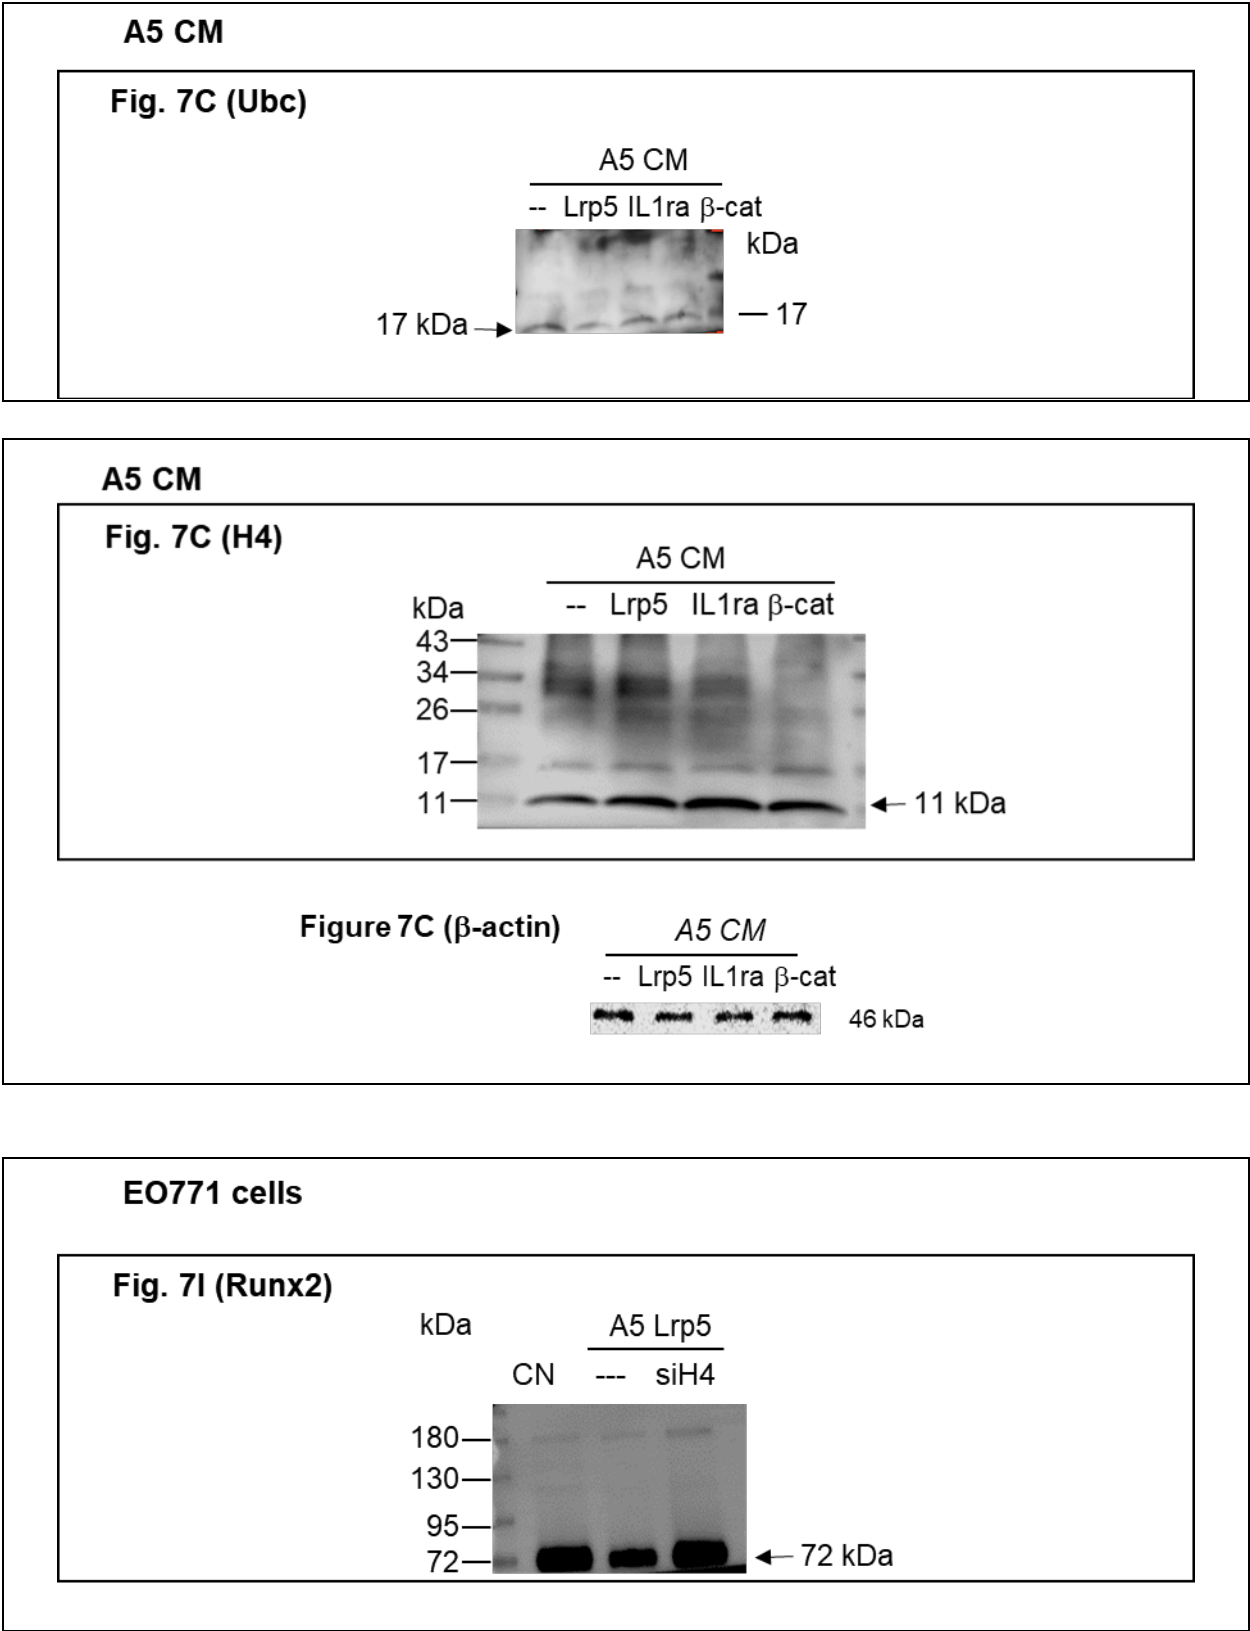

**Figure 7I (MMP9)**

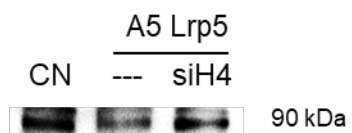

**Figure 7I (TGFβ)**

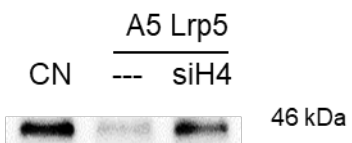

**Figure 7I (Snail)**

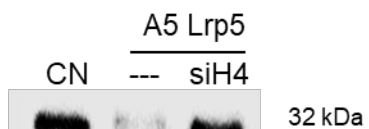

**EO771 cells**

**Fig. 7I (IL1β)**

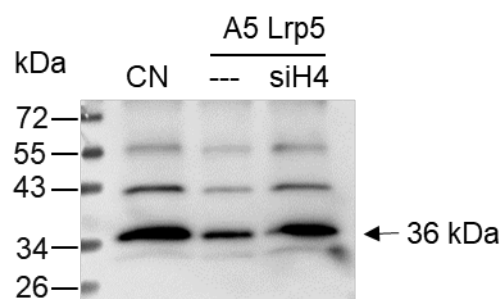

**Figure 7I (β-actin)**

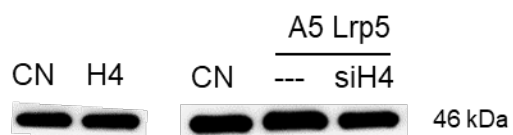

**Figure 7**

**EO771 cells**

**Fig. 7I (IL1 $\beta$ )**

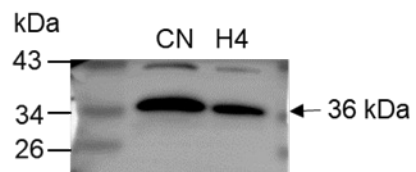

**Fig. 7I (MMP9)**

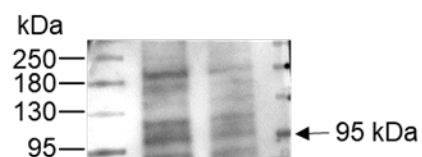

**Fig. 7I (Runx2)**

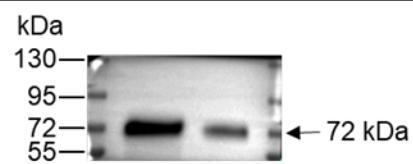

**Fig. 7I (Snail)**

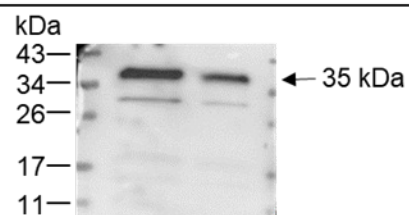

**Fig. 7I (TGF $\beta$ )**

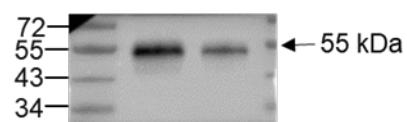



Figure 7

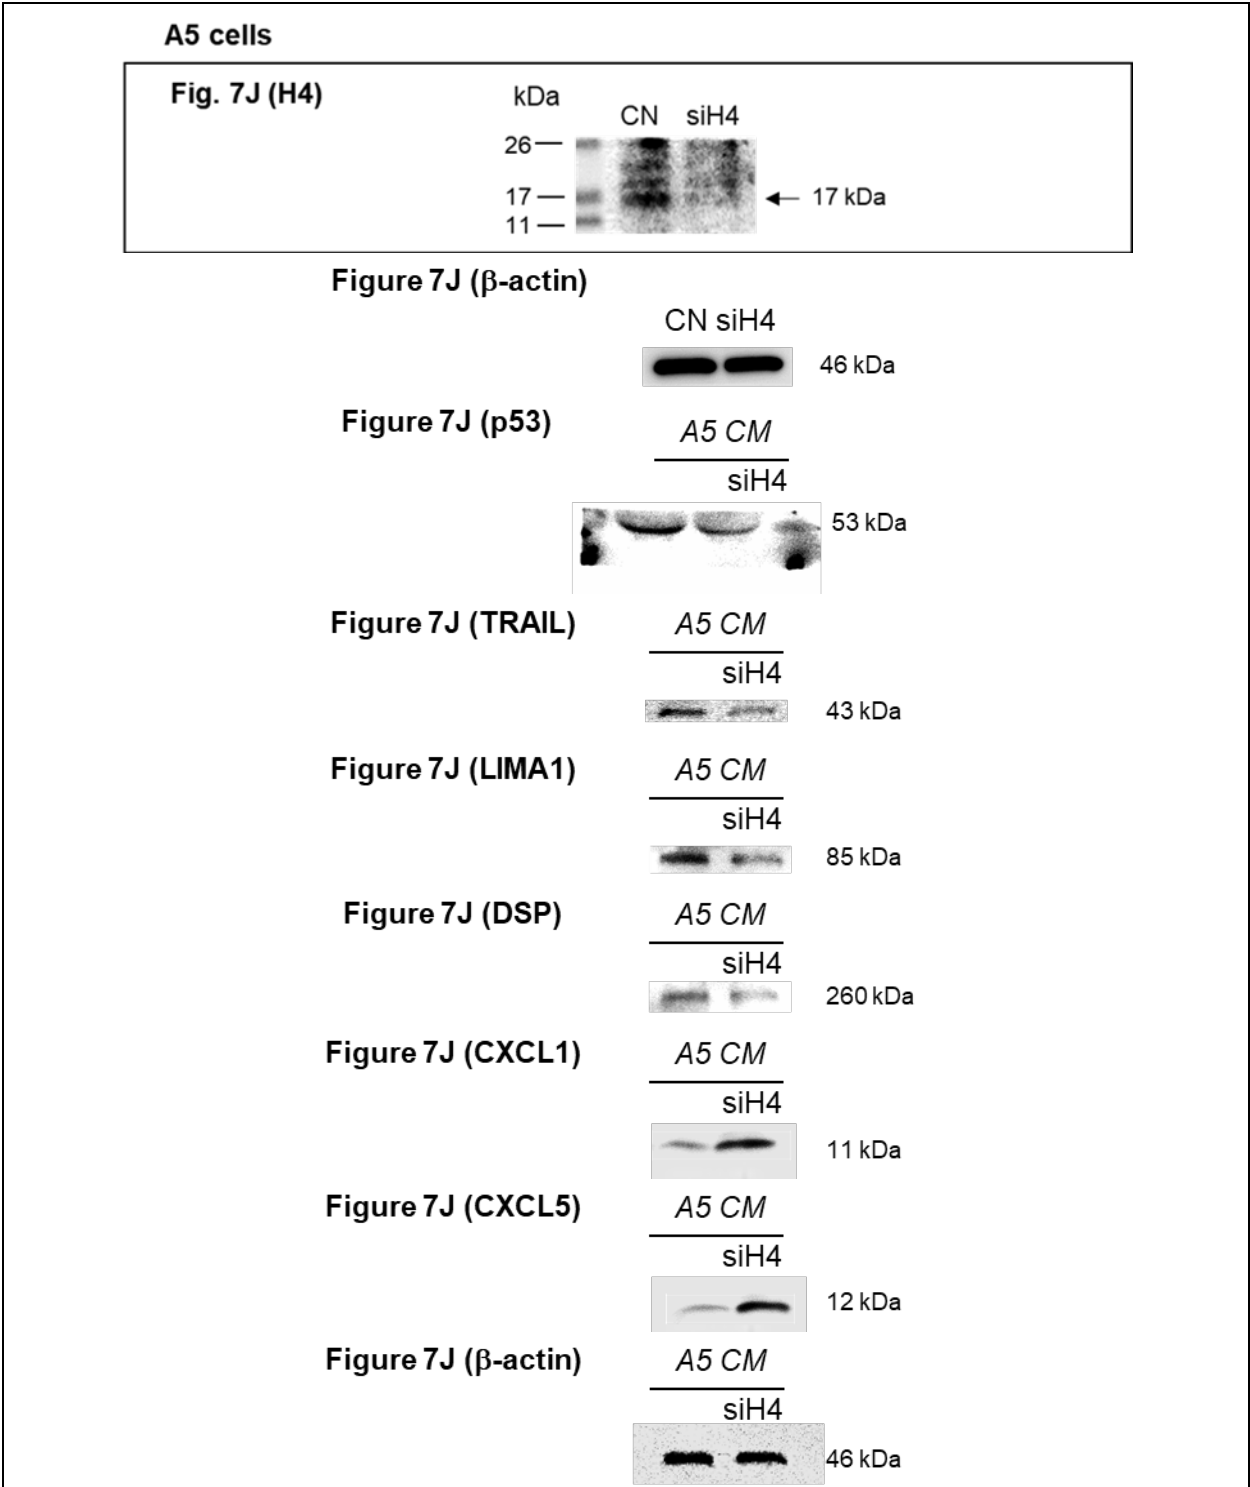

Figure 8

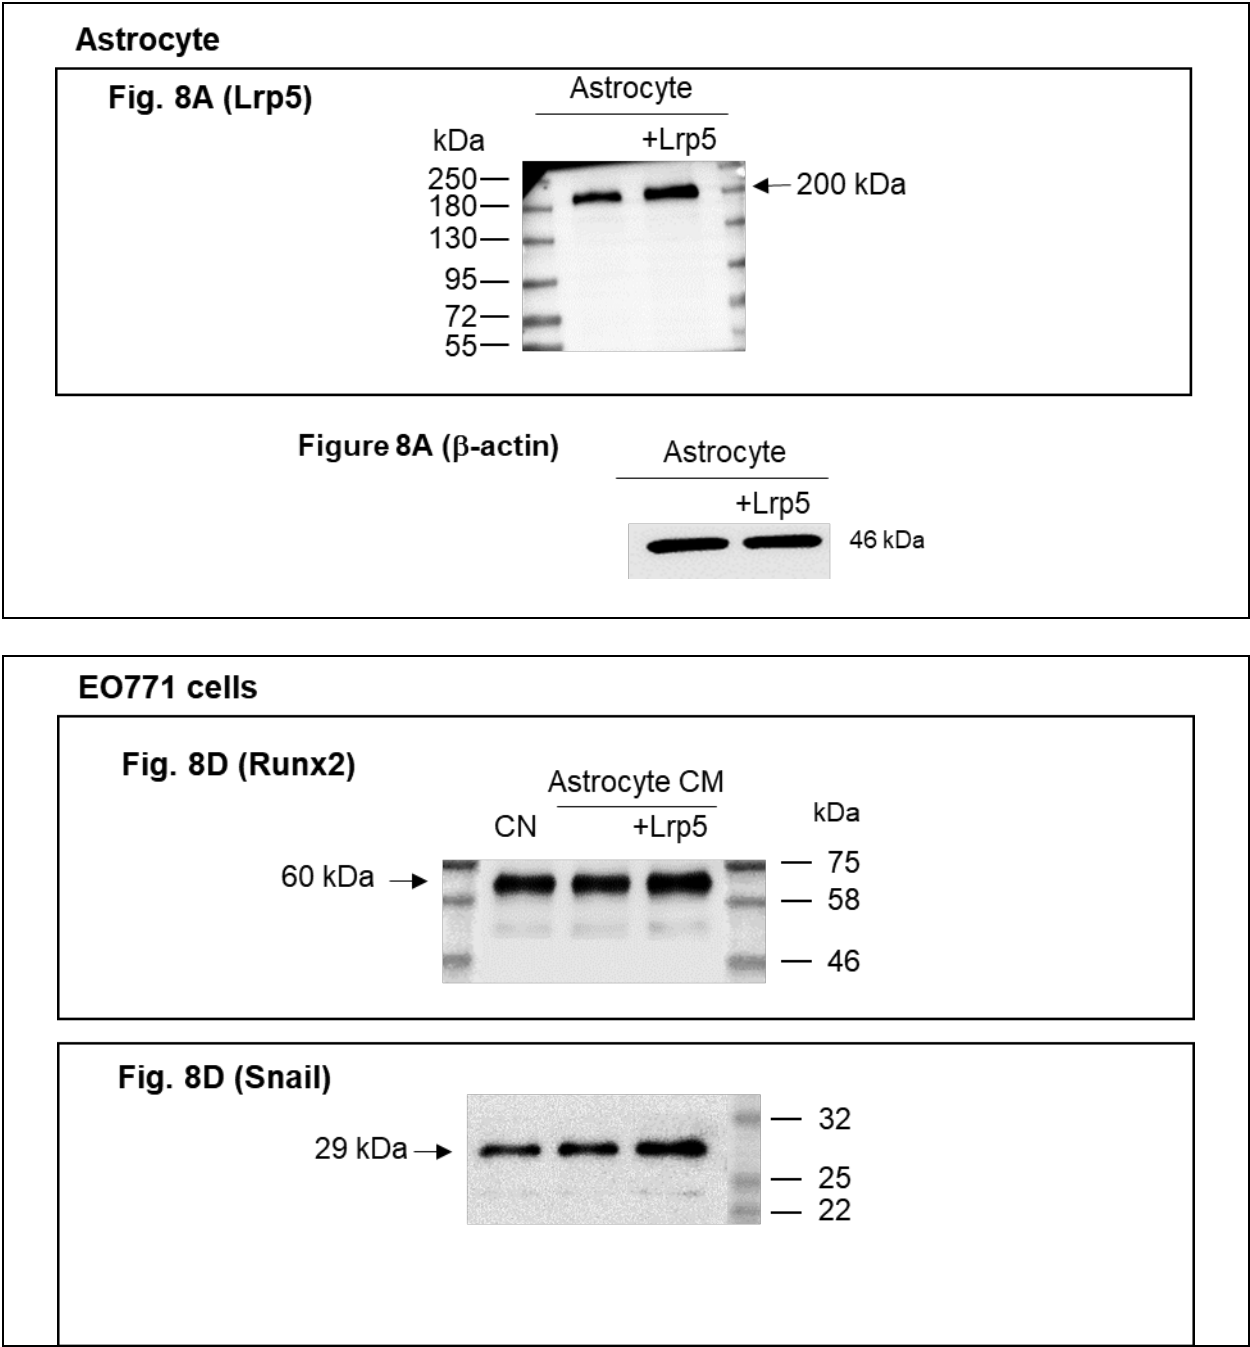

Figure 8

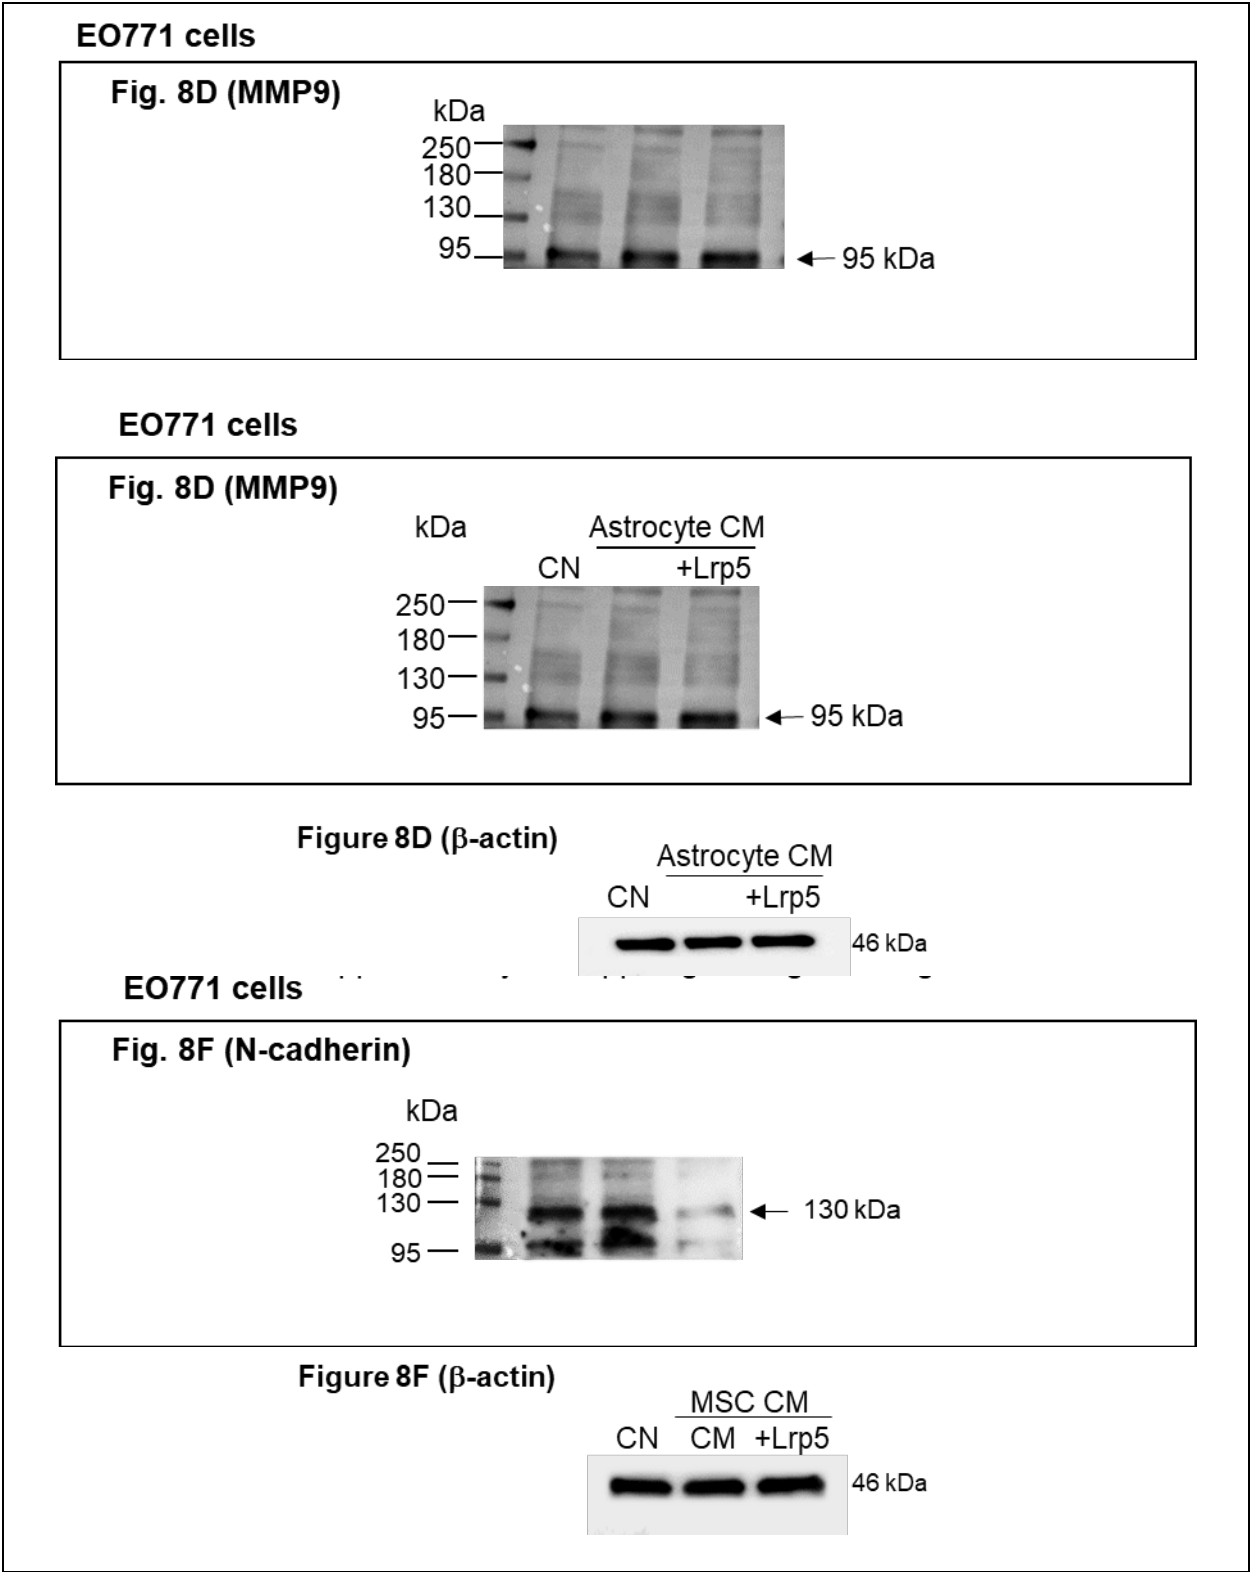

Figure 8

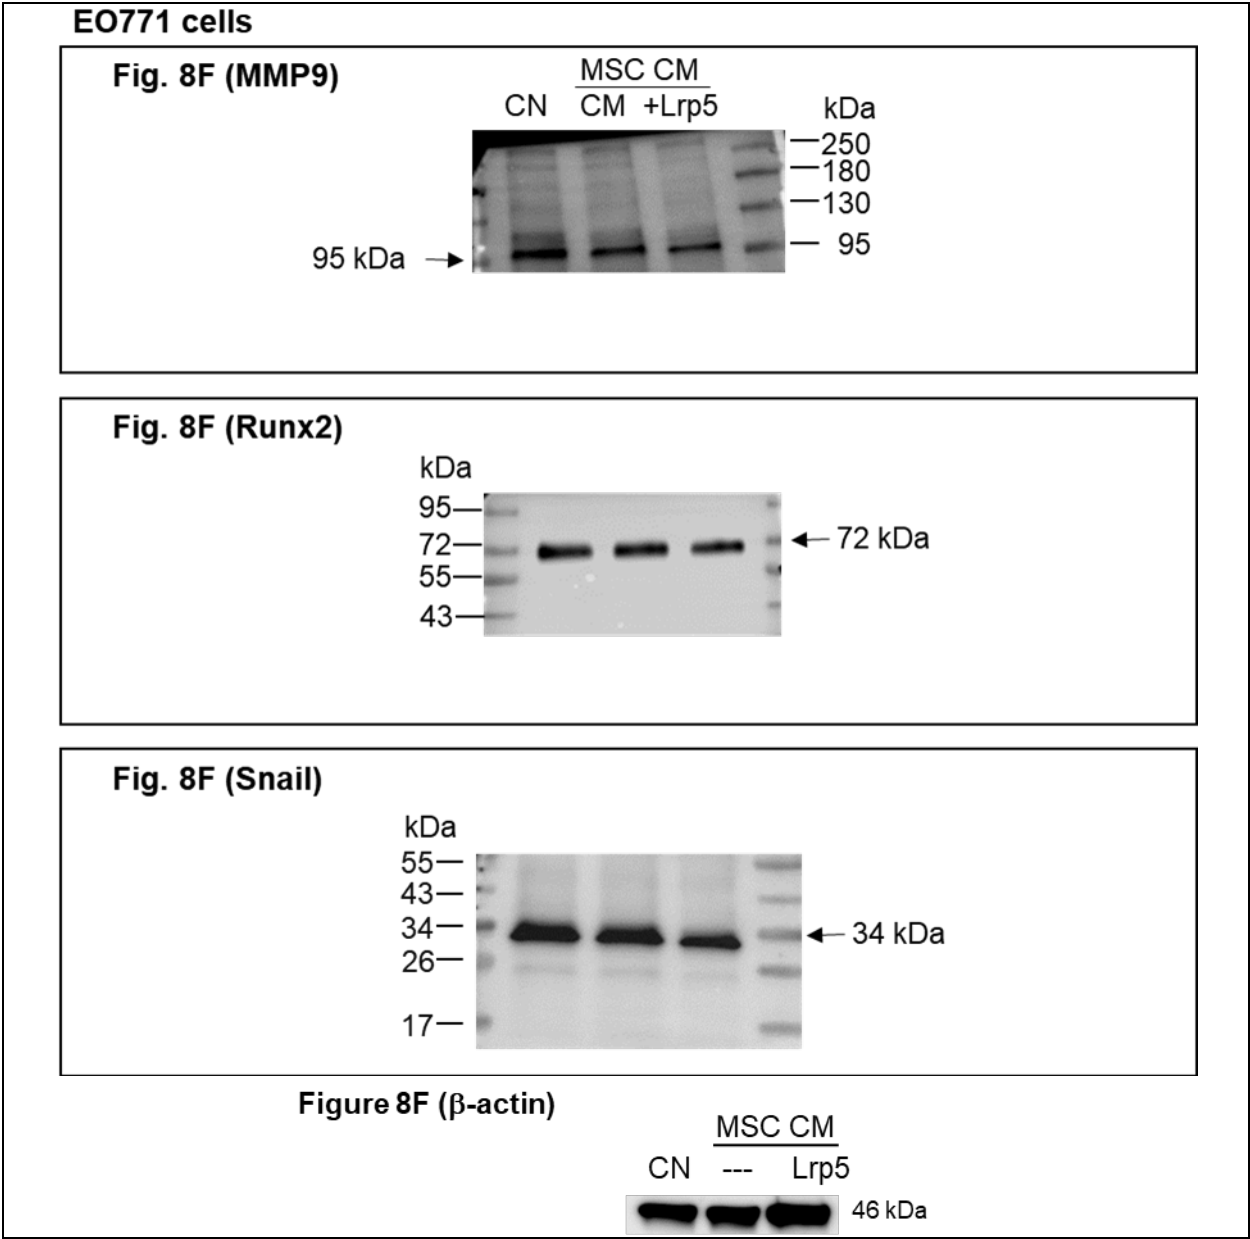

Supplement: s1 [file s1]
